# Supplementary material for: CircNF1-419 improves the gut microbiome structure and function in AD-like mice
Source: publisher site journal article supplement (doi:10.18632/aging.102614), 2020-01-06
Supplement: Supplementary file 1 [file aging-v12i1-102614-supplementary-material-SD2.docx]

**Supplementary Table 1. Different expression of circRNAs in the brain of APP/PS1 mice (control vs model group, Foldchange > 1.50, *p* < 0.01).**

| **circRNA_ID** | **Gene** | **mmu_circbase_id** | **Foldchange** | ***P*-Value** | **FDR** | **N** | **M** |
| --- | --- | --- | --- | --- | --- | --- | --- |
| chr14_84532875_84533695_+ | Pcdh17 | NA | -155.286 | 3.88E-06 | 0.022668 | 0.743727 | 0 |
| chr1_39263319_39300733_+ | Npas2 | mm9_circ_003043 | -6.90833 | 1.66E-05 | 0.027682 | 1.965565 | 0.239323 |
| chr12_85028770_85030887_+ | Ylpm1 | NA | 160.9632 | 2.33E-05 | 0.027682 | 0 | 0.658139 |
| chr1_140425193_140450304_+ | Kcnt2 | NA | -122.224 | 3.05E-05 | 0.027682 | 0.584357 | 0 |
| chr8_94047272_94055344_+ | Ogfod1 | NA | -122.224 | 3.05E-05 | 0.027682 | 0.584357 | 0 |
| chr10_93208172_93218089_+ | Cdk17 | NA | 153.6921 | 3.31E-05 | 0.027682 | 0 | 0.628224 |
| chr7_34284702_34285953_- | 4931406P16Rik | NA | 153.6921 | 3.31E-05 | 0.027682 | 0 | 0.628224 |
| chr5_72108308_72122193_+ | Gabrb1 | NA | -20.107 | 4.56E-05 | 0.031839 | 0.796851 | 0.029915 |
| chr13_43094749_43096806_+ | Phactr1 | NA | -10.1883 | 4.90E-05 | 0.031839 | 1.115591 | 0.089746 |
| chr3_158104428_158148699_- | Lrrc7 | NA | -111.204 | 6.31E-05 | 0.035833 | 0.531234 | 0 |
| chr11_79546971_79551134_+ | Nf1 | NA | 131.8789 | 9.94E-05 | 0.035833 | 0 | 0.538478 |
| chr6_52609145_52630349_- | Hibadh | NA | 131.8789 | 9.94E-05 | 0.035833 | 0 | 0.538478 |
| chr13_68887959_68982544_- | Adcy2 | NA | -5.3959 | 0.000104 | 0.035833 | 1.912442 | 0.299154 |
| chr7_46427346_46428279_+ | Kcnc1 | NA | 10.45731 | 0.00012 | 0.035833 | 0.106247 | 0.987209 |
| chr10_62633977_62643372_- | Ddx50 | NA | -100.184 | 0.000133 | 0.035833 | 0.47811 | 0 |
| chr12_69603476_69607412_- | Sos2 | NA | -100.184 | 0.000133 | 0.035833 | 0.47811 | 0 |
| chr14_103282598_103291362_- | Mycbp2 | NA | -100.184 | 0.000133 | 0.035833 | 0.47811 | 0 |
| chr2_155432816_155440785_- | Ncoa6 | NA | -100.184 | 0.000133 | 0.035833 | 0.47811 | 0 |
| chr6_3551013_3578915_+ | Ccdc132 | NA | -100.184 | 0.000133 | 0.035833 | 0.47811 | 0 |
| chr8_10384588_10413290_+ | Myo16 | NA | -100.184 | 0.000133 | 0.035833 | 0.47811 | 0 |
| chr9_59779543_59843138_+ | Myo9a | NA | -100.184 | 0.000133 | 0.035833 | 0.47811 | 0 |
| chr12_5451681_5452852_+ | not_annotated | NA | -6.44307 | 0.000146 | 0.035833 | 1.381208 | 0.179493 |
| chr6_99626896_99632412_- | Eif4e3 | NA | -11.4094 | 0.000154 | 0.035833 | 0.849974 | 0.059831 |
| chr9_77229485_77231029_- | not_annotated | NA | -11.4094 | 0.000154 | 0.035833 | 0.849974 | 0.059831 |
| chrX_70358267_70361131_- | Ids | NA | -17.4422 | 0.000156 | 0.035833 | 0.690604 | 0.029915 |
| chr10_108583874_108691063_- | Syt1 | NA | -7.72593 | 0.000165 | 0.035833 | 1.115591 | 0.119662 |
| chr15_81628293_81628737_+ | Ep300 | mm9_circ_005365 | 15.20551 | 0.000188 | 0.035833 | 0.053123 | 0.747886 |
| chr9_100834418_100855904_+ | Stag1 | NA | 15.20551 | 0.000188 | 0.035833 | 0.053123 | 0.747886 |
| chr1_136292880_136304456_- | Camsap2 | NA | 117.3368 | 0.000214 | 0.035833 | 0 | 0.478647 |
| chr5_121263885_121266405_+ | Gm15800 | NA | 117.3368 | 0.000214 | 0.035833 | 0 | 0.478647 |
| chr5_89057949_89199816_+ | Slc4a4 | NA | 117.3368 | 0.000214 | 0.035833 | 0 | 0.478647 |
| chr7_37479281_37493838_- | Zfp536 | mm9_circ_003344 | 117.3368 | 0.000214 | 0.035833 | 0 | 0.478647 |
| chr6_143029160_143072694_- | C2cd5 | NA | 6.109221 | 0.000215 | 0.035833 | 0.265617 | 1.406025 |
| chr9_77164765_77190737_- | Mlip | mm9_circ_012617 | -4.50983 | 0.000275 | 0.035833 | 2.071812 | 0.3889 |
| chr10_5218499_5222520_- | not_annotated | NA | -89.1632 | 0.000288 | 0.035833 | 0.424987 | 0 |
| chr11_79549408_79553997_+ | Nf1 | NA | -89.1632 | 0.000288 | 0.035833 | 0.424987 | 0 |
| chr12_98942218_98964607_+ | Ttc8 | NA | -89.1632 | 0.000288 | 0.035833 | 0.424987 | 0 |
| chr14_20556247_20562242_- | Usp54 | NA | -89.1632 | 0.000288 | 0.035833 | 0.424987 | 0 |
| chr19_48704218_48713573_+ | Sorcs3 | NA | -89.1632 | 0.000288 | 0.035833 | 0.424987 | 0 |
| chr2_12242411_12253578_- | Itga8 | NA | -89.1632 | 0.000288 | 0.035833 | 0.424987 | 0 |
| chr2_127465048_127465978_- | Kcnip3 | NA | -89.1632 | 0.000288 | 0.035833 | 0.424987 | 0 |
| chr2_37627435_37647285_- | Strbp | NA | -89.1632 | 0.000288 | 0.035833 | 0.424987 | 0 |
| chr2_70752235_70786995_- | Tlk1 | NA | -89.1632 | 0.000288 | 0.035833 | 0.424987 | 0 |
| chr5_86022379_86046580_- | Cenpc1 | NA | -89.1632 | 0.000288 | 0.035833 | 0.424987 | 0 |
| chr7_56982625_56985163_- | Gabrg3 | NA | -89.1632 | 0.000288 | 0.035833 | 0.424987 | 0 |
| chrX_113053062_113080215_- | Chm | NA | -89.1632 | 0.000288 | 0.035833 | 0.424987 | 0 |
| chr1_56831439_56891265_- | Satb2 | NA | -16.1098 | 0.000294 | 0.035833 | 0.637481 | 0.029915 |
| chr11_100596166_100601816_- | Dnajc7 | NA | -16.1098 | 0.000294 | 0.035833 | 0.637481 | 0.029915 |
| chr5_28331111_28362234_+ | Rbm33 | NA | 110.0658 | 0.000317 | 0.037108 | 0 | 0.448731 |
| chr6_99632257_99640710_- | Eif4e3 | NA | 110.0658 | 0.000317 | 0.037108 | 0 | 0.448731 |
| chr10_63289052_63307909_+ | Herc4 | NA | -4.07629 | 0.000348 | 0.039178 | 2.443676 | 0.508562 |
| chr5_18289524_18291620_- | Gnai1 | mm9_circ_005257 | 9.195018 | 0.000353 | 0.039178 | 0.106247 | 0.867547 |
| chr1_105691906_105696596_+ | 2310035C23Rik | NA | -8.25606 | 0.000355 | 0.039178 | 0.903098 | 0.089746 |
| chr3_52345039_52346390_+ | Foxo1 | NA | 7.287348 | 0.000394 | 0.042628 | 0.15937 | 1.017124 |
| chr1_164379359_164403077_+ | Nme7 | mm9_circ_000733 | -9.99128 | 0.000472 | 0.045785 | 0.743727 | 0.059831 |
| chr3_79172908_79175049_- | not_annotated | NA | 102.7947 | 0.000474 | 0.045785 | 0 | 0.418816 |
| chr6_116042871_116134457_- | Tmcc1 | NA | 102.7947 | 0.000474 | 0.045785 | 0 | 0.418816 |
| chr19_57751630_57755618_+ | Atrnl1 | NA | -3.48987 | 0.000484 | 0.045785 | 3.559267 | 0.867547 |
| chr3_120769159_120799747_- | not_annotated | NA | -4.3819 | 0.000487 | 0.045785 | 1.859319 | 0.358985 |
| chr19_29743533_29786449_- | 9930021J03Rik | NA | -5.04578 | 0.000503 | 0.045785 | 1.434331 | 0.239323 |
| chr1_152844036_152844407_- | Smg7 | mm9_circ_000025 | -14.7774 | 0.000562 | 0.045785 | 0.584357 | 0.029915 |
| chr13_59460469_59462173_- | Agtpbp1 | NA | 8.563872 | 0.000618 | 0.045785 | 0.106247 | 0.807716 |
| chr1_53865041_53891260_- | Hecw2 | NA | -78.1428 | 0.000639 | 0.045785 | 0.371864 | 0 |
| chr10_89068100_89117002_- | Ano4 | NA | -78.1428 | 0.000639 | 0.045785 | 0.371864 | 0 |
| chr12_38427404_38438734_+ | Dgkb | NA | -78.1428 | 0.000639 | 0.045785 | 0.371864 | 0 |
| chr13_63871796_63877533_+ | Ercc6l2 | NA | -78.1428 | 0.000639 | 0.045785 | 0.371864 | 0 |
| chr13_94528165_94547893_+ | Ap3b1 | NA | -78.1428 | 0.000639 | 0.045785 | 0.371864 | 0 |
| chr14_16818690_16819151_- | Rarb | NA | -78.1428 | 0.000639 | 0.045785 | 0.371864 | 0 |
| chr17_26742042_26759949_+ | Crebrf | NA | -78.1428 | 0.000639 | 0.045785 | 0.371864 | 0 |
| chr17_64624528_64651323_+ | Man2a1 | NA | -78.1428 | 0.000639 | 0.045785 | 0.371864 | 0 |
| chr17_66809466_66817977_- | Ptprm | NA | -78.1428 | 0.000639 | 0.045785 | 0.371864 | 0 |
| chr17_88549494_88572755_+ | Ppp1r21 | NA | -78.1428 | 0.000639 | 0.045785 | 0.371864 | 0 |
| chr2_113426525_113529463_+ | Fmn1 | NA | -78.1428 | 0.000639 | 0.045785 | 0.371864 | 0 |
| chr2_113426525_113636824_+ | Fmn1 | NA | -78.1428 | 0.000639 | 0.045785 | 0.371864 | 0 |
| chr3_146737934_146748047_- | Prkacb | NA | -78.1428 | 0.000639 | 0.045785 | 0.371864 | 0 |
| chr3_56019366_56058830_- | Nbea | NA | -78.1428 | 0.000639 | 0.045785 | 0.371864 | 0 |
| chr3_79169739_79210747_- | not_annotated | NA | -78.1428 | 0.000639 | 0.045785 | 0.371864 | 0 |
| chr4_99212577_99224550_+ | Atg4c | NA | -78.1428 | 0.000639 | 0.045785 | 0.371864 | 0 |
| chr5_81646410_81741146_+ | Lphn3 | NA | -78.1428 | 0.000639 | 0.045785 | 0.371864 | 0 |
| chr6_37048120_37064013_- | Dgki | NA | -78.1428 | 0.000639 | 0.045785 | 0.371864 | 0 |
| chr7_60785638_60902712_- | not_annotated | NA | -78.1428 | 0.000639 | 0.045785 | 0.371864 | 0 |
| chr10_49355909_49422672_- | Grik2 | NA | 4.193621 | 0.000642 | 0.045785 | 0.531234 | 1.914587 |
| chr2_58934369_58983007_- | Ccdc148 | NA | -5.92709 | 0.000707 | 0.049253 | 1.062468 | 0.149577 |
| chr19_37309788_37315517_- | Ide | NA | 95.52368 | 0.000716 | 0.049253 | 0 | 0.3889 |
| chr3_125914638_125915461_- | Ugt8a | NA | 95.52368 | 0.000716 | 0.049253 | 0 | 0.3889 |
| chr14_12418005_12454319_- | Cadps | NA | -9.28222 | 0.00084 | 0.056451 | 0.690604 | 0.059831 |
| chr15_62102345_62107465_+ | Pvt1 | NA | -9.28222 | 0.00084 | 0.056451 | 0.690604 | 0.059831 |
| chr11_107110813_107111635_- | Bptf | NA | 5.201992 | 0.000909 | 0.060402 | 0.265617 | 1.196617 |
| chr6_54173464_54220702_+ | Chn2 | NA | 12.18105 | 0.000939 | 0.061737 | 0.053123 | 0.598308 |
| chr9_96602713_96611499_- | Rasa2 | mm9_circ_004870 | -3.86921 | 0.001048 | 0.064162 | 1.912442 | 0.418816 |
| chr10_83313415_83316789_- | Slc41a2 | NA | 88.25263 | 0.00109 | 0.064162 | 0 | 0.358985 |
| chr14_73362961_73368427_- | Itm2b | NA | 88.25263 | 0.00109 | 0.064162 | 0 | 0.358985 |
| chrX_157990108_157999429_- | Cnksr2 | NA | 88.25263 | 0.00109 | 0.064162 | 0 | 0.358985 |
| chr11_5329879_5338763_- | Znrf3 | mm9_circ_007732 | -13.445 | 0.001091 | 0.064162 | 0.531234 | 0.029915 |
| chr7_132948044_132973623_+ | Zranb1 | mm9_circ_016232 | 7.932726 | 0.001092 | 0.064162 | 0.106247 | 0.747886 |
| chr13_63398083_63403038_- | Fancc | NA | 11.57616 | 0.001313 | 0.064162 | 0.053123 | 0.568393 |
| chr8_86631386_86673069_+ | Lonp2 | NA | -3.26137 | 0.001372 | 0.064162 | 2.868663 | 0.747886 |
| chr1_87364104_87365279_+ | Gigyf2 | NA | 6.219997 | 0.001391 | 0.064162 | 0.15937 | 0.867547 |
| chr1_178096590_178122812_+ | not_annotated | NA | -67.1224 | 0.001457 | 0.064162 | 0.31874 | 0 |
| chr1_191454047_191465550_- | not_annotated | NA | -67.1224 | 0.001457 | 0.064162 | 0.31874 | 0 |
| chr1_63277931_63295046_+ | Zdbf2 | NA | -67.1224 | 0.001457 | 0.064162 | 0.31874 | 0 |
| chr10_26302653_26352375_- | L3mbtl3 | mm9_circ_011517 | -67.1224 | 0.001457 | 0.064162 | 0.31874 | 0 |
| chr10_4301020_4310320_- | not_annotated | NA | -67.1224 | 0.001457 | 0.064162 | 0.31874 | 0 |
| chr10_75261794_75274100_+ | Specc1l | NA | -67.1224 | 0.001457 | 0.064162 | 0.31874 | 0 |
| chr11_65976337_65990535_- | Dnah9 | NA | -67.1224 | 0.001457 | 0.064162 | 0.31874 | 0 |
| chr13_88874553_88878181_+ | not_annotated | NA | -67.1224 | 0.001457 | 0.064162 | 0.31874 | 0 |
| chr14_18586851_18630431_- | Ube2e2 | NA | -67.1224 | 0.001457 | 0.064162 | 0.31874 | 0 |
| chr14_31715234_31748843_- | Ankrd28 | NA | -67.1224 | 0.001457 | 0.064162 | 0.31874 | 0 |
| chr14_79580185_79580789_+ | Elf1 | NA | -67.1224 | 0.001457 | 0.064162 | 0.31874 | 0 |
| chr15_35834184_35847007_+ | Vps13b | NA | -67.1224 | 0.001457 | 0.064162 | 0.31874 | 0 |
| chr16_56138985_56173273_+ | Senp7 | NA | -67.1224 | 0.001457 | 0.064162 | 0.31874 | 0 |
| chr16_63772910_63836437_- | Epha3 | NA | -67.1224 | 0.001457 | 0.064162 | 0.31874 | 0 |
| chr17_66257932_66262475_- | not_annotated | NA | -67.1224 | 0.001457 | 0.064162 | 0.31874 | 0 |
| chr18_75605628_75611779_- | Ctif | mm9_circ_011228 | -67.1224 | 0.001457 | 0.064162 | 0.31874 | 0 |
| chr19_27837407_27900903_- | Rfx3 | NA | -67.1224 | 0.001457 | 0.064162 | 0.31874 | 0 |
| chr19_38865616_38917972_+ | Tbc1d12 | NA | -67.1224 | 0.001457 | 0.064162 | 0.31874 | 0 |
| chr2_161810550_161812136_- | Ptprt | NA | -67.1224 | 0.001457 | 0.064162 | 0.31874 | 0 |
| chr3_36948517_36965026_+ | 4932438A13Rik | NA | -67.1224 | 0.001457 | 0.064162 | 0.31874 | 0 |
| chr4_11218612_11248311_- | Ints8 | NA | -67.1224 | 0.001457 | 0.064162 | 0.31874 | 0 |
| chr4_143162056_143194734_- | Prdm2 | NA | -67.1224 | 0.001457 | 0.064162 | 0.31874 | 0 |
| chr4_57244975_57270177_- | Ptpn3 | NA | -67.1224 | 0.001457 | 0.064162 | 0.31874 | 0 |
| chr4_87840682_87880148_- | Mllt3 | NA | -67.1224 | 0.001457 | 0.064162 | 0.31874 | 0 |
| chr5_121665099_121672198_+ | Brap | NA | -67.1224 | 0.001457 | 0.064162 | 0.31874 | 0 |
| chr5_137795491_137801096_+ | Zcwpw1 | NA | -67.1224 | 0.001457 | 0.064162 | 0.31874 | 0 |
| chr5_142969905_142970685_+ | Fscn1 | NA | -67.1224 | 0.001457 | 0.064162 | 0.31874 | 0 |
| chr5_48481937_48509760_- | Kcnip4 | NA | -67.1224 | 0.001457 | 0.064162 | 0.31874 | 0 |
| chr6_30088833_30102309_+ | Nrf1 | NA | -67.1224 | 0.001457 | 0.064162 | 0.31874 | 0 |
| chr8_10265435_10272797_+ | Myo16 | NA | -67.1224 | 0.001457 | 0.064162 | 0.31874 | 0 |
| chr8_72579563_72581272_+ | Tmem38a | NA | -67.1224 | 0.001457 | 0.064162 | 0.31874 | 0 |
| chr8_77344640_77450923_- | Arhgap10 | NA | -67.1224 | 0.001457 | 0.064162 | 0.31874 | 0 |
| chr9_44828784_44829268_- | Kmt2a | NA | -67.1224 | 0.001457 | 0.064162 | 0.31874 | 0 |
| chr9_99101175_99122376_- | Pik3cb | NA | -67.1224 | 0.001457 | 0.064162 | 0.31874 | 0 |
| chr7_24228048_24229840_- | Zfp109 | mm9_circ_008755 | 7.617153 | 0.001459 | 0.064162 | 0.106247 | 0.71797 |
| chr10_9778021_9800068_- | Stxbp5 | NA | -8.57315 | 0.001507 | 0.064338 | 0.637481 | 0.059831 |
| chr11_90257520_90267581_+ | Mmd | NA | -8.57315 | 0.001507 | 0.064338 | 0.637481 | 0.059831 |
| chr5_81646410_81694627_+ | Lphn3 | mm9_circ_018693 | -8.57315 | 0.001507 | 0.064338 | 0.637481 | 0.059831 |
| chr7_84343742_84354567_- | Arnt2 | mm9_circ_012725 | -8.57315 | 0.001507 | 0.064338 | 0.637481 | 0.059831 |
| chr9_24473774_24485729_- | Dpy19l1 | mm9_circ_006204 | -3.57752 | 0.00156 | 0.066099 | 2.018689 | 0.478647 |
| chr8_77384751_77411128_- | Arhgap10 | NA | -2.94882 | 0.001644 | 0.066467 | 4.143624 | 1.196617 |
| chr11_16981801_16995355_- | Plek | NA | 80.98158 | 0.001675 | 0.066467 | 0 | 0.32907 |
| chr12_65105028_65114018_+ | Fancm | NA | 80.98158 | 0.001675 | 0.066467 | 0 | 0.32907 |
| chr3_56040854_56082491_- | Nbea | NA | 80.98158 | 0.001675 | 0.066467 | 0 | 0.32907 |
| chr5_113558349_113561085_+ | Wscd2 | NA | 80.98158 | 0.001675 | 0.066467 | 0 | 0.32907 |
| chr6_54218524_54220702_+ | Chn2 | NA | 80.98158 | 0.001675 | 0.066467 | 0 | 0.32907 |
| chr8_85870152_85879810_+ | Phkb | NA | 80.98158 | 0.001675 | 0.066467 | 0 | 0.32907 |
| chrX_151565372_151599584_+ | Phf8 | NA | 80.98158 | 0.001675 | 0.066467 | 0 | 0.32907 |
| chr12_38173727_38228123_+ | Dgkb | NA | -6.80684 | 0.001689 | 0.066467 | 0.743727 | 0.089746 |
| chr18_21008725_21020999_+ | Rnf138 | NA | -5.89433 | 0.001735 | 0.066467 | 0.849974 | 0.119662 |
| chr17_43037595_43040189_+ | Tnfrsf21 | NA | 6.006527 | 0.001802 | 0.066467 | 0.15937 | 0.837632 |
| chr3_59037560_59042413_+ | Med12l | NA | -4.05031 | 0.001825 | 0.066467 | 1.434331 | 0.299154 |
| chr11_20703711_20709746_- | Aftph | mm9_circ_009096 | 10.97126 | 0.001844 | 0.066467 | 0.053123 | 0.538478 |
| chr10_42196466_42197901_- | Foxo3 | NA | 7.30158 | 0.001955 | 0.066467 | 0.106247 | 0.688055 |
| chr4_6822905_6842426_- | Tox | mm9_circ_001129 | -4.16183 | 0.001972 | 0.066467 | 1.328085 | 0.269239 |
| chr16_14127056_14140372_- | Marf1 | NA | -12.1126 | 0.002146 | 0.066467 | 0.47811 | 0.029915 |
| chr16_36886131_36907895_+ | Golgb1 | NA | -12.1126 | 0.002146 | 0.066467 | 0.47811 | 0.029915 |
| chr3_146463185_146493843_- | Spata1 | NA | -12.1126 | 0.002146 | 0.066467 | 0.47811 | 0.029915 |
| chr6_3565516_3571108_+ | Ccdc132 | NA | -12.1126 | 0.002146 | 0.066467 | 0.47811 | 0.029915 |
| chr9_55874645_55895382_- | Scaper | NA | -12.1126 | 0.002146 | 0.066467 | 0.47811 | 0.029915 |
| chr10_5403841_5426275_- | Syne1 | mm9_circ_001767 | 2.555928 | 0.002591 | 0.066467 | 4.302994 | 9.393442 |
| chr1_139101968_139144000_+ | Dennd1b | NA | 10.36637 | 0.002602 | 0.066467 | 0.053123 | 0.508562 |
| chr14_45205342_45213524_- | Txndc16 | NA | 10.36637 | 0.002602 | 0.066467 | 0.053123 | 0.508562 |
| chr10_107045213_107053516_- | Acss3 | NA | 73.71052 | 0.002603 | 0.066467 | 0 | 0.299154 |
| chr12_52880639_52888063_+ | Akap6 | NA | 73.71052 | 0.002603 | 0.066467 | 0 | 0.299154 |
| chr13_76822973_76891614_+ | Mctp1 | NA | 73.71052 | 0.002603 | 0.066467 | 0 | 0.299154 |
| chr14_21234833_21240571_+ | Adk | NA | 73.71052 | 0.002603 | 0.066467 | 0 | 0.299154 |
| chr16_89860205_89867734_- | Tiam1 | mm9_circ_000811 | 73.71052 | 0.002603 | 0.066467 | 0 | 0.299154 |
| chr18_63738743_63760785_+ | Wdr7 | NA | 73.71052 | 0.002603 | 0.066467 | 0 | 0.299154 |
| chr5_34420001_34466447_+ | Fam193a | NA | 73.71052 | 0.002603 | 0.066467 | 0 | 0.299154 |
| chr5_76609631_76637071_+ | Cep135 | NA | 73.71052 | 0.002603 | 0.066467 | 0 | 0.299154 |
| chr6_134506196_134520593_- | Lrp6 | NA | 73.71052 | 0.002603 | 0.066467 | 0 | 0.299154 |
| chr7_98979636_99016674_- | Uvrag | NA | 73.71052 | 0.002603 | 0.066467 | 0 | 0.299154 |
| chr9_22024674_22036857_- | Elavl3 | NA | 73.71052 | 0.002603 | 0.066467 | 0 | 0.299154 |
| chr9_78457210_78458047_+ | Mto1 | NA | 73.71052 | 0.002603 | 0.066467 | 0 | 0.299154 |
| chr9_99040921_99042669_- | Pik3cb | NA | 73.71052 | 0.002603 | 0.066467 | 0 | 0.299154 |
| chrX_94252415_94253126_+ | Klhl15 | NA | 73.71052 | 0.002603 | 0.066467 | 0 | 0.299154 |
| chr14_99186481_99211070_+ | Pibf1 | NA | -7.86408 | 0.002729 | 0.066467 | 0.584357 | 0.059831 |
| chr15_98805044_98805224_- | Ddn | NA | -7.86408 | 0.002729 | 0.066467 | 0.584357 | 0.059831 |
| chr16_31743106_31797010_+ | Dlg1 | NA | -7.86408 | 0.002729 | 0.066467 | 0.584357 | 0.059831 |
| chr5_117616832_117671501_+ | Ksr2 | NA | -7.86408 | 0.002729 | 0.066467 | 0.584357 | 0.059831 |
| chr6_71552399_71579836_+ | Chmp3 | NA | -7.86408 | 0.002729 | 0.066467 | 0.584357 | 0.059831 |
| chr8_91299229_91305017_- | Rpgrip1l | NA | -7.86408 | 0.002729 | 0.066467 | 0.584357 | 0.059831 |
| chr11_6313788_6324922_+ | Ogdh | NA | -7.86408 | 0.002729 | 0.066467 | 0.584357 | 0.059831 |
| chr12_84292284_84298202_+ | Ptgr2 | NA | -7.86408 | 0.002729 | 0.066467 | 0.584357 | 0.059831 |
| chr12_89976347_90204818_+ | Nrxn3 | NA | -7.86408 | 0.002729 | 0.066467 | 0.584357 | 0.059831 |
| chr2_12355277_12386679_- | Fam188a | NA | -5.52802 | 0.00282 | 0.066467 | 0.796851 | 0.119662 |
| chrX_120399402_120401897_+ | Pcdh11x | NA | -5.52802 | 0.00282 | 0.066467 | 0.796851 | 0.119662 |
| chrX_151547395_151556135_+ | Phf8 | NA | -6.32377 | 0.002878 | 0.066467 | 0.690604 | 0.089746 |
| chr5_23979488_23991837_- | Fam126a | NA | -4.26627 | 0.003414 | 0.066467 | 1.062468 | 0.209408 |
| chr1_119706155_119726096_- | Ptpn4 | NA | -56.102 | 0.003432 | 0.066467 | 0.265617 | 0 |
| chr1_134607688_134619698_+ | Kdm5b | NA | -56.102 | 0.003432 | 0.066467 | 0.265617 | 0 |
| chr1_158520444_158580361_+ | Astn1 | NA | -56.102 | 0.003432 | 0.066467 | 0.265617 | 0 |
| chr1_165399654_165429315_- | Dcaf6 | NA | -56.102 | 0.003432 | 0.066467 | 0.265617 | 0 |
| chr1_174736294_174744306_+ | Fmn2 | NA | -56.102 | 0.003432 | 0.066467 | 0.265617 | 0 |
| chr1_180093944_180117743_+ | Cdc42bpa | NA | -56.102 | 0.003432 | 0.066467 | 0.265617 | 0 |
| chr1_181190303_181190739_- | not_annotated | NA | -56.102 | 0.003432 | 0.066467 | 0.265617 | 0 |
| chr1_39287468_39300733_+ | Npas2 | NA | -56.102 | 0.003432 | 0.066467 | 0.265617 | 0 |
| chr1_60105311_60109449_+ | Carf | NA | -56.102 | 0.003432 | 0.066467 | 0.265617 | 0 |
| chr1_66322404_66380773_+ | Map2 | NA | -56.102 | 0.003432 | 0.066467 | 0.265617 | 0 |
| chr1_78443635_78472634_- | Farsb | NA | -56.102 | 0.003432 | 0.066467 | 0.265617 | 0 |
| chr1_93052424_93060817_- | Kif1a | NA | -56.102 | 0.003432 | 0.066467 | 0.265617 | 0 |
| chr10_10741436_10782794_- | Grm1 | NA | -56.102 | 0.003432 | 0.066467 | 0.265617 | 0 |
| chr10_122622301_122650433_- | not_annotated | NA | -56.102 | 0.003432 | 0.066467 | 0.265617 | 0 |
| chr10_127452692_127459575_+ | R3hdm2 | NA | -56.102 | 0.003432 | 0.066467 | 0.265617 | 0 |
| chr10_45588380_45605584_+ | Hace1 | NA | -56.102 | 0.003432 | 0.066467 | 0.265617 | 0 |
| chr10_81108748_81118229_+ | Map2k2 | mm9_circ_000870 | -56.102 | 0.003432 | 0.066467 | 0.265617 | 0 |
| chr11_66017365_66037736_- | Dnah9 | NA | -56.102 | 0.003432 | 0.066467 | 0.265617 | 0 |
| chr11_72189548_72198963_- | 4933427D14Rik | NA | -56.102 | 0.003432 | 0.066467 | 0.265617 | 0 |
| chr11_77563664_77585494_- | Taok1 | NA | -56.102 | 0.003432 | 0.066467 | 0.265617 | 0 |
| chr11_97226729_97238258_- | Npepps | NA | -56.102 | 0.003432 | 0.066467 | 0.265617 | 0 |
| chr11_98821431_98823399_+ | Casc3 | NA | -56.102 | 0.003432 | 0.066467 | 0.265617 | 0 |
| chr12_103141772_103149081_+ | Unc79 | NA | -56.102 | 0.003432 | 0.066467 | 0.265617 | 0 |
| chr12_36521433_36550451_+ | Ispd | NA | -56.102 | 0.003432 | 0.066467 | 0.265617 | 0 |
| chr12_40621221_40676790_+ | Dock4 | NA | -56.102 | 0.003432 | 0.066467 | 0.265617 | 0 |
| chr12_98227168_98234397_- | Galc | NA | -56.102 | 0.003432 | 0.066467 | 0.265617 | 0 |
| chr12_98783582_98805247_+ | Zc3h14 | NA | -56.102 | 0.003432 | 0.066467 | 0.265617 | 0 |
| chr13_13725814_13730481_+ | Lyst | NA | -56.102 | 0.003432 | 0.066467 | 0.265617 | 0 |
| chr13_52506266_52506621_- | Diras2 | NA | -56.102 | 0.003432 | 0.066467 | 0.265617 | 0 |
| chr13_54758275_54760371_- | Sncb | NA | -56.102 | 0.003432 | 0.066467 | 0.265617 | 0 |
| chr13_68982347_68982544_- | Adcy2 | mm9_circ_018195 | -56.102 | 0.003432 | 0.066467 | 0.265617 | 0 |
| chr13_9550184_9553471_+ | Dip2c | NA | -56.102 | 0.003432 | 0.066467 | 0.265617 | 0 |
| chr14_105150253_105160613_- | Rbm26 | NA | -56.102 | 0.003432 | 0.066467 | 0.265617 | 0 |
| chr14_20569114_20573901_- | Usp54 | NA | -56.102 | 0.003432 | 0.066467 | 0.265617 | 0 |
| chr14_23336040_23449211_- | Kcnma1 | NA | -56.102 | 0.003432 | 0.066467 | 0.265617 | 0 |
| chr14_31363479_31373824_+ | Capn7 | NA | -56.102 | 0.003432 | 0.066467 | 0.265617 | 0 |
| chr14_62900255_62934402_+ | Wdfy2 | NA | -56.102 | 0.003432 | 0.066467 | 0.265617 | 0 |
| chr14_70235140_70240981_- | Ppp3cc | NA | -56.102 | 0.003432 | 0.066467 | 0.265617 | 0 |
| chr14_73366321_73368427_- | Itm2b | NA | -56.102 | 0.003432 | 0.066467 | 0.265617 | 0 |
| chr15_82169738_82172899_+ | Srebf2 | NA | -56.102 | 0.003432 | 0.066467 | 0.265617 | 0 |
| chr16_13566570_13640330_- | Parn | NA | -56.102 | 0.003432 | 0.066467 | 0.265617 | 0 |
| chr16_13843771_13845423_- | Pdxdc1 | NA | -56.102 | 0.003432 | 0.066467 | 0.265617 | 0 |
| chr16_17015898_17038439_+ | Mapk1 | NA | -56.102 | 0.003432 | 0.066467 | 0.265617 | 0 |
| chr16_63595558_63612974_- | Epha3 | NA | -56.102 | 0.003432 | 0.066467 | 0.265617 | 0 |
| chr16_72742126_72935786_+ | Robo1 | NA | -56.102 | 0.003432 | 0.066467 | 0.265617 | 0 |
| chr16_91651630_91664822_+ | Son | NA | -56.102 | 0.003432 | 0.066467 | 0.265617 | 0 |
| chr17_30481014_30530365_- | Btbd9 | NA | -56.102 | 0.003432 | 0.066467 | 0.265617 | 0 |
| chr17_3448378_3454351_+ | Tiam2 | NA | -56.102 | 0.003432 | 0.066467 | 0.265617 | 0 |
| chr17_62686016_62689139_- | not_annotated | NA | -56.102 | 0.003432 | 0.066467 | 0.265617 | 0 |
| chr17_84334026_84336882_- | Thada | NA | -56.102 | 0.003432 | 0.066467 | 0.265617 | 0 |
| chr18_10582055_10595875_- | Esco1 | NA | -56.102 | 0.003432 | 0.066467 | 0.265617 | 0 |
| chr18_82656949_82658206_- | Zfp236 | NA | -56.102 | 0.003432 | 0.066467 | 0.265617 | 0 |
| chr19_26619684_26683922_+ | Smarca2 | NA | -56.102 | 0.003432 | 0.066467 | 0.265617 | 0 |
| chr19_32247994_32269981_- | Sgms1 | NA | -56.102 | 0.003432 | 0.066467 | 0.265617 | 0 |
| chr19_34821100_34841109_- | Pank1 | NA | -56.102 | 0.003432 | 0.066467 | 0.265617 | 0 |
| chr19_4288412_4290871_- | Adrbk1 | NA | -56.102 | 0.003432 | 0.066467 | 0.265617 | 0 |
| chr19_48704218_48722997_+ | Sorcs3 | NA | -56.102 | 0.003432 | 0.066467 | 0.265617 | 0 |
| chr2_110665832_110698020_- | Ano3 | NA | -56.102 | 0.003432 | 0.066467 | 0.265617 | 0 |
| chr2_126574702_126588044_+ | Slc27a2 | NA | -56.102 | 0.003432 | 0.066467 | 0.265617 | 0 |
| chr2_129629963_129630556_+ | Sirpa | NA | -56.102 | 0.003432 | 0.066467 | 0.265617 | 0 |
| chr2_35889265_35944959_- | Ttll11 | mm9_circ_017990 | -56.102 | 0.003432 | 0.066467 | 0.265617 | 0 |
| chr2_37586510_37647285_- | Strbp | NA | -56.102 | 0.003432 | 0.066467 | 0.265617 | 0 |
| chr2_59968627_60006189_- | Baz2b | NA | -56.102 | 0.003432 | 0.066467 | 0.265617 | 0 |
| chr2_68263235_68369105_- | Stk39 | NA | -56.102 | 0.003432 | 0.066467 | 0.265617 | 0 |
| chr2_91546322_91550758_+ | Ckap5 | mm9_circ_014001 | -56.102 | 0.003432 | 0.066467 | 0.265617 | 0 |
| chr3_100578476_100632598_- | Man1a2 | NA | -56.102 | 0.003432 | 0.066467 | 0.265617 | 0 |
| chr3_109562743_109578364_+ | Vav3 | mm9_circ_014582 | -56.102 | 0.003432 | 0.066467 | 0.265617 | 0 |
| chr3_158084456_158135405_- | Lrrc7 | NA | -56.102 | 0.003432 | 0.066467 | 0.265617 | 0 |
| chr3_75527588_75533594_- | Pdcd10 | NA | -56.102 | 0.003432 | 0.066467 | 0.265617 | 0 |
| chr3_95341334_95345599_- | Setdb1 | NA | -56.102 | 0.003432 | 0.066467 | 0.265617 | 0 |
| chr4_102852883_102870724_+ | Sgip1 | NA | -56.102 | 0.003432 | 0.066467 | 0.265617 | 0 |
| chr4_104479074_104613267_+ | Dab1 | NA | -56.102 | 0.003432 | 0.066467 | 0.265617 | 0 |
| chr4_109343284_109385562_+ | Eps15 | NA | -56.102 | 0.003432 | 0.066467 | 0.265617 | 0 |
| chr4_125089875_125090147_+ | Meaf6 | NA | -56.102 | 0.003432 | 0.066467 | 0.265617 | 0 |
| chr4_137321119_137336129_- | Cdc42 | NA | -56.102 | 0.003432 | 0.066467 | 0.265617 | 0 |
| chr4_150431523_150500051_+ | Rere | NA | -56.102 | 0.003432 | 0.066467 | 0.265617 | 0 |
| chr4_155075589_155082754_- | Rer1 | NA | -56.102 | 0.003432 | 0.066467 | 0.265617 | 0 |
| chr4_33040733_33045199_+ | Ube2j1 | NA | -56.102 | 0.003432 | 0.066467 | 0.265617 | 0 |
| chr4_86774238_86781711_+ | Dennd4c | NA | -56.102 | 0.003432 | 0.066467 | 0.265617 | 0 |
| chr4_89148189_89156613_+ | Mtap | NA | -56.102 | 0.003432 | 0.066467 | 0.265617 | 0 |
| chr5_112941633_112969269_- | Adrbk2 | NA | -56.102 | 0.003432 | 0.066467 | 0.265617 | 0 |
| chr5_113550423_113561085_+ | Wscd2 | NA | -56.102 | 0.003432 | 0.066467 | 0.265617 | 0 |
| chr5_122540304_122551203_- | Ift81 | NA | -56.102 | 0.003432 | 0.066467 | 0.265617 | 0 |
| chr5_123617336_123623270_- | Clip1 | NA | -56.102 | 0.003432 | 0.066467 | 0.265617 | 0 |
| chr5_147521830_147531307_+ | Pan3 | NA | -56.102 | 0.003432 | 0.066467 | 0.265617 | 0 |
| chr5_27382755_27557633_+ | Dpp6 | NA | -56.102 | 0.003432 | 0.066467 | 0.265617 | 0 |
| chr5_34420001_34485848_+ | Fam193a | NA | -56.102 | 0.003432 | 0.066467 | 0.265617 | 0 |
| chr5_66993143_67002649_+ | Limch1 | NA | -56.102 | 0.003432 | 0.066467 | 0.265617 | 0 |
| chr5_67647693_67779033_- | Atp8a1 | NA | -56.102 | 0.003432 | 0.066467 | 0.265617 | 0 |
| chr5_93138438_93148582_+ | 11-Sep | NA | -56.102 | 0.003432 | 0.066467 | 0.265617 | 0 |
| chr5_9511458_9512524_- | Grm3 | NA | -56.102 | 0.003432 | 0.066467 | 0.265617 | 0 |
| chr5_96223771_96231792_+ | Mrpl1 | NA | -56.102 | 0.003432 | 0.066467 | 0.265617 | 0 |
| chr6_149005166_149009900_- | Dennd5b | NA | -56.102 | 0.003432 | 0.066467 | 0.265617 | 0 |
| chr6_23287664_23528163_- | Cadps2 | NA | -56.102 | 0.003432 | 0.066467 | 0.265617 | 0 |
| chr6_55276554_55284813_+ | Fam188b | NA | -56.102 | 0.003432 | 0.066467 | 0.265617 | 0 |
| chr6_86710399_86711679_- | Gmcl1 | NA | -56.102 | 0.003432 | 0.066467 | 0.265617 | 0 |
| chr7_19643052_19655830_- | Clptm1 | NA | -56.102 | 0.003432 | 0.066467 | 0.265617 | 0 |
| chr7_57488802_57508138_- | Gabra5 | NA | -56.102 | 0.003432 | 0.066467 | 0.265617 | 0 |
| chr7_6392182_6399915_+ | Zfp28 | NA | -56.102 | 0.003432 | 0.066467 | 0.265617 | 0 |
| chr8_10384588_10442359_+ | Myo16 | NA | -56.102 | 0.003432 | 0.066467 | 0.265617 | 0 |
| chr8_123264995_123267699_+ | Zfp276 | NA | -56.102 | 0.003432 | 0.066467 | 0.265617 | 0 |
| chr8_125801461_125892032_- | Pcnxl2 | NA | -56.102 | 0.003432 | 0.066467 | 0.265617 | 0 |
| chr8_22211538_22217209_+ | Vps36 | NA | -56.102 | 0.003432 | 0.066467 | 0.265617 | 0 |
| chr8_85875634_85942389_+ | Phkb | NA | -56.102 | 0.003432 | 0.066467 | 0.265617 | 0 |
| chr8_95746973_95749074_- | Cnot1 | NA | -56.102 | 0.003432 | 0.066467 | 0.265617 | 0 |
| chr9_121073918_121145386_- | Ulk4 | NA | -56.102 | 0.003432 | 0.066467 | 0.265617 | 0 |
| chr9_27069668_27089377_+ | Ncapd3 | NA | -56.102 | 0.003432 | 0.066467 | 0.265617 | 0 |
| chr9_36923584_36987272_- | Pknox2 | NA | -56.102 | 0.003432 | 0.066467 | 0.265617 | 0 |
| chr9_41393194_41402263_+ | 3110039I08Rik | NA | -56.102 | 0.003432 | 0.066467 | 0.265617 | 0 |
| chr9_49062193_49066842_+ | Zw10 | NA | -56.102 | 0.003432 | 0.066467 | 0.265617 | 0 |
| chr9_54883897_54906923_+ | Ireb2 | NA | -56.102 | 0.003432 | 0.066467 | 0.265617 | 0 |
| chr9_58955959_58985876_- | Neo1 | NA | -56.102 | 0.003432 | 0.066467 | 0.265617 | 0 |
| chr9_59779543_59912590_+ | Myo9a | NA | -56.102 | 0.003432 | 0.066467 | 0.265617 | 0 |
| chr9_6967080_6996939_- | Dync2h1 | NA | -56.102 | 0.003432 | 0.066467 | 0.265617 | 0 |
| chr5_23979488_24000019_- | Fam126a | NA | -3.18303 | 0.003499 | 0.067414 | 2.018689 | 0.538478 |
| chr13_93341756_93356079_+ | Homer1 | mm9_circ_010239 | -2.68933 | 0.003544 | 0.067414 | 4.249871 | 1.346194 |
| chr16_90950351_90969374_- | Synj1 | NA | 9.761477 | 0.00369 | 0.067414 | 0.053123 | 0.478647 |
| chr11_51598276_51599596_+ | Phykpl | NA | 9.761477 | 0.00369 | 0.067414 | 0.053123 | 0.478647 |
| chr6_71505734_71510220_+ | Rnf103 | NA | 3.680862 | 0.003754 | 0.067414 | 0.424987 | 1.346194 |
| chr16_81432709_81443271_+ | Ncam2 | NA | -4.46748 | 0.003789 | 0.067414 | 0.956221 | 0.179493 |
| chr9_77216977_77230954_- | not_annotated | NA | -3.19189 | 0.003863 | 0.067414 | 1.912442 | 0.508562 |
| chr8_114230206_114236798_+ | Vat1l | NA | 5.366116 | 0.003968 | 0.067414 | 0.15937 | 0.747886 |
| chr9_110547209_110553234_+ | Setd2 | NA | 66.43947 | 0.004092 | 0.067414 | 0 | 0.269239 |
| chr1_179961044_180139804_+ | Cdc42bpa | NA | 66.43947 | 0.004092 | 0.067414 | 0 | 0.269239 |
| chr1_84738678_84739656_- | Trip12 | NA | 66.43947 | 0.004092 | 0.067414 | 0 | 0.269239 |
| chr1_91376318_91387341_- | Ilkap | NA | 66.43947 | 0.004092 | 0.067414 | 0 | 0.269239 |
| chr10_90523429_90680919_+ | Anks1b | NA | 66.43947 | 0.004092 | 0.067414 | 0 | 0.269239 |
| chr11_120116865_120129312_- | Slc38a10 | NA | 66.43947 | 0.004092 | 0.067414 | 0 | 0.269239 |
| chr11_20238466_20242238_- | Cep68 | NA | 66.43947 | 0.004092 | 0.067414 | 0 | 0.269239 |
| chr14_122658678_122714125_+ | Pcca | NA | 66.43947 | 0.004092 | 0.067414 | 0 | 0.269239 |
| chr14_122971740_122973285_- | Tmtc4 | NA | 66.43947 | 0.004092 | 0.067414 | 0 | 0.269239 |
| chr14_14013073_14013655_+ | Atxn7 | NA | 66.43947 | 0.004092 | 0.067414 | 0 | 0.269239 |
| chr15_44380060_44420873_- | Nudcd1 | NA | 66.43947 | 0.004092 | 0.067414 | 0 | 0.269239 |
| chr16_31805614_31812824_+ | Dlg1 | NA | 66.43947 | 0.004092 | 0.067414 | 0 | 0.269239 |
| chr16_70433545_70441319_+ | Gbe1 | NA | 66.43947 | 0.004092 | 0.067414 | 0 | 0.269239 |
| chr17_78820621_78831585_- | Heatr5b | NA | 66.43947 | 0.004092 | 0.067414 | 0 | 0.269239 |
| chr2_155292690_155331258_- | Pigu | NA | 66.43947 | 0.004092 | 0.067414 | 0 | 0.269239 |
| chr2_167510876_167511326_+ | Rnf114 | NA | 66.43947 | 0.004092 | 0.067414 | 0 | 0.269239 |
| chr2_18071125_18126229_+ | Mllt10 | NA | 66.43947 | 0.004092 | 0.067414 | 0 | 0.269239 |
| chr2_37936619_38136975_- | Dennd1a | NA | 66.43947 | 0.004092 | 0.067414 | 0 | 0.269239 |
| chr2_62158206_62234569_+ | Slc4a10 | NA | 66.43947 | 0.004092 | 0.067414 | 0 | 0.269239 |
| chr3_107445430_107448440_- | Kcnc4 | NA | 66.43947 | 0.004092 | 0.067414 | 0 | 0.269239 |
| chr3_120772682_120805493_- | not_annotated | NA | 66.43947 | 0.004092 | 0.067414 | 0 | 0.269239 |
| chr3_122947361_122969249_- | Usp53 | NA | 66.43947 | 0.004092 | 0.067414 | 0 | 0.269239 |
| chr4_41216566_41235594_- | Ubap2 | NA | 66.43947 | 0.004092 | 0.067414 | 0 | 0.269239 |
| chr4_48208697_48219527_- | Erp44 | NA | 66.43947 | 0.004092 | 0.067414 | 0 | 0.269239 |
| chr4_65381456_65397058_- | Astn2 | NA | 66.43947 | 0.004092 | 0.067414 | 0 | 0.269239 |
| chr5_19273640_19278693_+ | not_annotated | NA | 66.43947 | 0.004092 | 0.067414 | 0 | 0.269239 |
| chr5_67705906_67751085_- | Atp8a1 | NA | 66.43947 | 0.004092 | 0.067414 | 0 | 0.269239 |
| chr5_76254374_76274043_- | Clock | NA | 66.43947 | 0.004092 | 0.067414 | 0 | 0.269239 |
| chr6_83942834_83962108_+ | Zfml | NA | 66.43947 | 0.004092 | 0.067414 | 0 | 0.269239 |
| chr7_78191650_78260414_- | Ntrk3 | NA | 66.43947 | 0.004092 | 0.067414 | 0 | 0.269239 |
| chr8_105663754_105666792_+ | Ctcf | NA | 66.43947 | 0.004092 | 0.067414 | 0 | 0.269239 |
| chr8_114230206_114284389_+ | Vat1l | NA | 66.43947 | 0.004092 | 0.067414 | 0 | 0.269239 |
| chr8_11785713_11786260_+ | Arhgef7 | NA | 66.43947 | 0.004092 | 0.067414 | 0 | 0.269239 |
| chr8_45792781_45823835_+ | Sorbs2 | NA | 66.43947 | 0.004092 | 0.067414 | 0 | 0.269239 |
| chr9_101114507_101145790_+ | not_annotated | NA | 66.43947 | 0.004092 | 0.067414 | 0 | 0.269239 |
| chr9_22643745_22812543_+ | Bbs9 | NA | 66.43947 | 0.004092 | 0.067414 | 0 | 0.269239 |
| chr9_55377480_55400647_+ | AI118078 | NA | 66.43947 | 0.004092 | 0.067414 | 0 | 0.269239 |
| chr9_63286399_63303160_- | Map2k5 | mm9_circ_012141 | 66.43947 | 0.004092 | 0.067414 | 0 | 0.269239 |
| chr9_64501523_64508808_+ | Megf11 | NA | 66.43947 | 0.004092 | 0.067414 | 0 | 0.269239 |
| chr9_65034875_65078785_+ | Dpp8 | NA | 66.43947 | 0.004092 | 0.067414 | 0 | 0.269239 |
| chr9_83398512_83426961_- | Lca5 | NA | 66.43947 | 0.004092 | 0.067414 | 0 | 0.269239 |
| chr9_96839086_96840117_- | Pxylp1 | NA | 66.43947 | 0.004092 | 0.067414 | 0 | 0.269239 |
| chrX_13157669_13158944_+ | Usp9x | NA | 66.43947 | 0.004092 | 0.067414 | 0 | 0.269239 |
| chrX_142752040_142834341_+ | Tmem164 | NA | 66.43947 | 0.004092 | 0.067414 | 0 | 0.269239 |
| chrX_94098307_94114263_- | Zfx | NA | 66.43947 | 0.004092 | 0.067414 | 0 | 0.269239 |
| chr1_6807543_6828021_+ | St18 | NA | -10.7801 | 0.004284 | 0.068644 | 0.424987 | 0.029915 |
| chr1_8414203_8448132_- | Sntg1 | mm9_circ_001517 | -10.7801 | 0.004284 | 0.068644 | 0.424987 | 0.029915 |
| chr12_82384651_82403179_+ | Sipa1l1 | NA | -10.7801 | 0.004284 | 0.068644 | 0.424987 | 0.029915 |
| chr16_33204672_33206002_+ | Osbpl11 | NA | -10.7801 | 0.004284 | 0.068644 | 0.424987 | 0.029915 |
| chr18_71321031_71342777_- | Dcc | mm9_circ_006690 | -10.7801 | 0.004284 | 0.068644 | 0.424987 | 0.029915 |
| chr5_148505997_148512002_- | Ubl3 | NA | -10.7801 | 0.004284 | 0.068644 | 0.424987 | 0.029915 |
| chr5_16299929_16320158_+ | Cacna2d1 | NA | -10.7801 | 0.004284 | 0.068644 | 0.424987 | 0.029915 |
| chr5_23507405_23565265_- | Srpk2 | NA | -10.7801 | 0.004284 | 0.068644 | 0.424987 | 0.029915 |
| chr6_76915734_77143943_- | Ctnna2 | NA | -10.7801 | 0.004284 | 0.068644 | 0.424987 | 0.029915 |
| chr9_55162968_55195519_+ | Ube2q2 | NA | -10.7801 | 0.004284 | 0.068644 | 0.424987 | 0.029915 |
| chr10_109816254_109824681_- | Nav3 | mm9_circ_005597 | -3.92825 | 0.004456 | 0.071021 | 1.115591 | 0.239323 |
| chr15_91786966_91814733_+ | Lrrk2 | NA | -3.92825 | 0.004456 | 0.071021 | 1.115591 | 0.239323 |
| chr12_50419853_50428234_- | Prkd1 | NA | -5.1617 | 0.004603 | 0.072963 | 0.743727 | 0.119662 |
| chr6_65855949_65901859_+ | Prdm5 | NA | -5.1617 | 0.004603 | 0.072963 | 0.743727 | 0.119662 |
| chr10_29196265_29199280_+ | Soga3 | NA | 6.354861 | 0.004789 | 0.075453 | 0.106247 | 0.598308 |
| chr17_79650302_79672573_+ | Rmdn2 | NA | 6.354861 | 0.004789 | 0.075453 | 0.106247 | 0.598308 |
| chr5_20543585_20569354_+ | Magi2 | mm9_circ_011587 | -3.2131 | 0.004799 | 0.075453 | 1.699948 | 0.448731 |
| chr11_29498409_29504311_+ | Ccdc88a | NA | -5.8407 | 0.004933 | 0.076558 | 0.637481 | 0.089746 |
| chr12_61839408_61851035_+ | Lrfn5 | NA | -5.8407 | 0.004933 | 0.076558 | 0.637481 | 0.089746 |
| chr10_45670346_45686733_+ | Hace1 | NA | -7.15501 | 0.004987 | 0.076558 | 0.531234 | 0.059831 |
| chr12_109718114_109718499_+ | not_annotated | mm9_circ_016120 | -7.15501 | 0.004987 | 0.076558 | 0.531234 | 0.059831 |
| chr13_55034889_55060342_- | Uimc1 | NA | -7.15501 | 0.004987 | 0.076558 | 0.531234 | 0.059831 |
| chr17_55496292_55498406_+ | St6gal2 | NA | -7.15501 | 0.004987 | 0.076558 | 0.531234 | 0.059831 |
| chr5_23450152_23486400_+ | Kmt2e | NA | -7.15501 | 0.004987 | 0.076558 | 0.531234 | 0.059831 |
| chr6_37029763_37064013_- | Dgki | NA | -7.15501 | 0.004987 | 0.076558 | 0.531234 | 0.059831 |
| chr9_10168768_10172122_- | Cntn5 | NA | -7.15501 | 0.004987 | 0.076558 | 0.531234 | 0.059831 |
| chr8_36937560_36938758_- | Dlc1 | mm9_circ_011180 | -4.05392 | 0.005058 | 0.077441 | 1.009344 | 0.209408 |
| chr10_105369950_105370778_- | Tmtc2 | NA | 5.152646 | 0.005185 | 0.078769 | 0.15937 | 0.71797 |
| chr10_116937397_116939481_- | Rab3ip | NA | 5.152646 | 0.005185 | 0.078769 | 0.15937 | 0.71797 |
| chr15_23173451_23226977_+ | Cdh18 | NA | 5.152646 | 0.005185 | 0.078769 | 0.15937 | 0.71797 |
| chr18_61839690_61857185_- | Ablim3 | NA | 9.156584 | 0.00526 | 0.079497 | 0.053123 | 0.448731 |
| chr5_89129639_89179844_+ | Slc4a4 | NA | 9.156584 | 0.00526 | 0.079497 | 0.053123 | 0.448731 |
| chr12_77331896_77365359_+ | Fut8 | NA | 2.900655 | 0.005295 | 0.079826 | 0.903098 | 2.243657 |
| chr14_45244155_45246516_+ | Gpr137c | mm9_circ_002142 | 2.916908 | 0.005627 | 0.084611 | 0.849974 | 2.123995 |
| chr8_16023739_16037308_- | Csmd1 | mm9_circ_003539 | -2.94217 | 0.005663 | 0.084934 | 2.071812 | 0.598308 |
| chr2_113426522_113478963_+ | Fmn1 | NA | -4.22053 | 0.00577 | 0.08599 | 0.903098 | 0.179493 |
| chr12_24878191_24924294_+ | Mboat2 | mm9_circ_013240 | -2.59818 | 0.005939 | 0.08599 | 3.559267 | 1.166701 |
| chr16_63772910_63773570_- | Epha3 | mm9_circ_017801 | 3.348537 | 0.005945 | 0.08599 | 0.47811 | 1.376109 |
| chr3_26133242_26134052_- | Nlgn1 | NA | -2.51183 | 0.00604 | 0.08599 | 4.409241 | 1.495771 |
| chr13_93341756_93349297_+ | Homer1 | NA | -3.24078 | 0.006141 | 0.08599 | 1.487455 | 0.3889 |
| chr2_156524881_156525288_+ | Epb4.1l1 | NA | 6.039288 | 0.006494 | 0.08599 | 0.106247 | 0.568393 |
| chr9_110026101_110036855_+ | Map4 | NA | 6.039288 | 0.006494 | 0.08599 | 0.106247 | 0.568393 |
| chr1_155846798_155848727_- | Cep350 | NA | 59.16842 | 0.006513 | 0.08599 | 0 | 0.239323 |
| chr1_174666643_174719937_+ | Fmn2 | NA | 59.16842 | 0.006513 | 0.08599 | 0 | 0.239323 |
| chr1_192413017_192434919_+ | Kcnh1 | NA | 59.16842 | 0.006513 | 0.08599 | 0 | 0.239323 |
| chr1_40004807_40014697_+ | Map4k4 | NA | 59.16842 | 0.006513 | 0.08599 | 0 | 0.239323 |
| chr10_9835834_9866680_- | Stxbp5 | NA | 59.16842 | 0.006513 | 0.08599 | 0 | 0.239323 |
| chr10_99675578_99691798_+ | not_annotated | NA | 59.16842 | 0.006513 | 0.08599 | 0 | 0.239323 |
| chr11_33264636_33318347_- | Ranbp17 | NA | 59.16842 | 0.006513 | 0.08599 | 0 | 0.239323 |
| chr11_4527836_4531305_- | Mtmr3 | NA | 59.16842 | 0.006513 | 0.08599 | 0 | 0.239323 |
| chr11_50071171_50095980_+ | Rnf130 | NA | 59.16842 | 0.006513 | 0.08599 | 0 | 0.239323 |
| chr11_90535480_90600280_- | Stxbp4 | NA | 59.16842 | 0.006513 | 0.08599 | 0 | 0.239323 |
| chr12_118125739_118157397_- | Dnah11 | NA | 59.16842 | 0.006513 | 0.08599 | 0 | 0.239323 |
| chr12_90204511_90283659_+ | Nrxn3 | NA | 59.16842 | 0.006513 | 0.08599 | 0 | 0.239323 |
| chr13_106865865_106886757_- | Ipo11 | NA | 59.16842 | 0.006513 | 0.08599 | 0 | 0.239323 |
| chr13_6552634_6556702_+ | Pitrm1 | NA | 59.16842 | 0.006513 | 0.08599 | 0 | 0.239323 |
| chr14_26608090_26612061_+ | Dennd6a | NA | 59.16842 | 0.006513 | 0.08599 | 0 | 0.239323 |
| chr14_56941998_56944237_+ | Zmym2 | NA | 59.16842 | 0.006513 | 0.08599 | 0 | 0.239323 |
| chr15_100955410_100959694_+ | Scn8a | NA | 59.16842 | 0.006513 | 0.08599 | 0 | 0.239323 |
| chr16_38241282_38242145_+ | Gsk3b | NA | 59.16842 | 0.006513 | 0.08599 | 0 | 0.239323 |
| chr17_70786788_70787209_+ | Dlgap1 | NA | 59.16842 | 0.006513 | 0.08599 | 0 | 0.239323 |
| chr17_74217027_74258505_- | Memo1 | NA | 59.16842 | 0.006513 | 0.08599 | 0 | 0.239323 |
| chr17_74668759_74670382_+ | Birc6 | mm9_circ_013298 | 59.16842 | 0.006513 | 0.08599 | 0 | 0.239323 |
| chr17_80241952_80273110_- | Dhx57 | NA | 59.16842 | 0.006513 | 0.08599 | 0 | 0.239323 |
| chr18_20865950_20867853_- | Trappc8 | NA | 59.16842 | 0.006513 | 0.08599 | 0 | 0.239323 |
| chr18_33874142_33891476_- | Epb4.1l4a | NA | 59.16842 | 0.006513 | 0.08599 | 0 | 0.239323 |
| chr18_80434166_80460013_- | Ctdp1 | NA | 59.16842 | 0.006513 | 0.08599 | 0 | 0.239323 |
| chr18_84558327_84563046_- | Zfp407 | NA | 59.16842 | 0.006513 | 0.08599 | 0 | 0.239323 |
| chr18_89026959_89048520_+ | Rttn | NA | 59.16842 | 0.006513 | 0.08599 | 0 | 0.239323 |
| chr2_140181574_140193643_+ | Ndufaf5 | NA | 59.16842 | 0.006513 | 0.08599 | 0 | 0.239323 |
| chr2_59644324_59724849_+ | Tanc1 | NA | 59.16842 | 0.006513 | 0.08599 | 0 | 0.239323 |
| chr3_120797196_120799747_- | not_annotated | NA | 59.16842 | 0.006513 | 0.08599 | 0 | 0.239323 |
| chr3_55665574_55710739_- | Nbea | NA | 59.16842 | 0.006513 | 0.08599 | 0 | 0.239323 |
| chr3_59068242_59077169_+ | Med12l | NA | 59.16842 | 0.006513 | 0.08599 | 0 | 0.239323 |
| chr4_43091228_43115160_+ | Unc13b | NA | 59.16842 | 0.006513 | 0.08599 | 0 | 0.239323 |
| chr4_58861525_58879134_- | AI314180 | NA | 59.16842 | 0.006513 | 0.08599 | 0 | 0.239323 |
| chr5_115166868_115169148_- | Cabp1 | NA | 59.16842 | 0.006513 | 0.08599 | 0 | 0.239323 |
| chr5_115166868_115173224_- | Cabp1 | NA | 59.16842 | 0.006513 | 0.08599 | 0 | 0.239323 |
| chr6_134479509_134513419_- | Lrp6 | NA | 59.16842 | 0.006513 | 0.08599 | 0 | 0.239323 |
| chr6_22132229_22145687_+ | Cped1 | mm9_circ_015231 | 59.16842 | 0.006513 | 0.08599 | 0 | 0.239323 |
| chr6_99529708_99651791_- | Eif4e3 | NA | 59.16842 | 0.006513 | 0.08599 | 0 | 0.239323 |
| chr7_7181233_7188122_+ | Zfp418 | NA | 59.16842 | 0.006513 | 0.08599 | 0 | 0.239323 |
| chr8_110815903_110817718_- | Sf3b3 | NA | 59.16842 | 0.006513 | 0.08599 | 0 | 0.239323 |
| chr9_106964707_106978774_- | Dock3 | NA | 59.16842 | 0.006513 | 0.08599 | 0 | 0.239323 |
| chr9_14571623_14575439_- | Amotl1 | mm9_circ_000340 | 59.16842 | 0.006513 | 0.08599 | 0 | 0.239323 |
| chr9_59801914_59815378_+ | Myo9a | NA | 59.16842 | 0.006513 | 0.08599 | 0 | 0.239323 |
| chrX_71287152_71299774_+ | Mtm1 | NA | 59.16842 | 0.006513 | 0.08599 | 0 | 0.239323 |
| chrX_85730202_85746301_- | Gyk | NA | 59.16842 | 0.006513 | 0.08599 | 0 | 0.239323 |
| chr11_79425513_79475883_+ | Nf1 | NA | 4.376918 | 0.006671 | 0.087874 | 0.212494 | 0.807716 |
| chr8_73214125_73340286_- | Large | NA | -3.25804 | 0.007038 | 0.092507 | 1.381208 | 0.358985 |
| chr8_39063191_39071516_+ | Tusc3 | mm9_circ_003872 | -3.11875 | 0.007126 | 0.093447 | 1.540578 | 0.418816 |
| chr3_29148347_29153601_+ | Egfem1 | mm9_circ_010647 | -3.014 | 0.007144 | 0.093476 | 1.699948 | 0.478647 |
| chr10_121288880_121306883_- | Tbc1d30 | mm9_circ_017963 | -3.84157 | 0.007504 | 0.096871 | 0.956221 | 0.209408 |
| chr12_13285183_13310304_+ | Nbas | mm9_circ_015179 | 8.551692 | 0.007536 | 0.096871 | 0.053123 | 0.418816 |
| chr13_106982524_106988075_- | Kif2a | NA | 8.551692 | 0.007536 | 0.096871 | 0.053123 | 0.418816 |
| chr19_57132862_57155335_- | Ablim1 | NA | 8.551692 | 0.007536 | 0.096871 | 0.053123 | 0.418816 |
| chr2_18159456_18197997_+ | Mllt10 | NA | 8.551692 | 0.007536 | 0.096871 | 0.053123 | 0.418816 |
| chr2_181631435_181632087_+ | Prpf6 | NA | 8.551692 | 0.007536 | 0.096871 | 0.053123 | 0.418816 |
| chr7_78247155_78462942_- | Ntrk3 | NA | 8.551692 | 0.007536 | 0.096871 | 0.053123 | 0.418816 |
| chrX_147480257_147492087_- | Lrch2 | NA | 8.551692 | 0.007536 | 0.096871 | 0.053123 | 0.418816 |
| chr13_55245518_55248077_+ | Nsd1 | NA | 3.354671 | 0.007631 | 0.097876 | 0.424987 | 1.226532 |
| chr5_3722546_3772787_- | Ankib1 | NA | -3.27839 | 0.008147 | 0.099186 | 1.274961 | 0.32907 |
| chr8_77344640_77358634_- | Arhgap10 | NA | -3.01285 | 0.008155 | 0.099186 | 1.593702 | 0.448731 |
| chr13_8844787_8861265_- | Wdr37 | NA | -45.0816 | 0.008389 | 0.099186 | 0.212494 | 0 |
| chr11_72728761_72738456_+ | Ankfy1 | NA | -45.0816 | 0.008389 | 0.099186 | 0.212494 | 0 |
| chr11_97217791_97238258_- | Npepps | NA | -45.0816 | 0.008389 | 0.099186 | 0.212494 | 0 |
| chr13_45723236_45956575_- | Atxn1 | NA | -45.0816 | 0.008389 | 0.099186 | 0.212494 | 0 |
| chr15_91401754_91412217_- | Slc2a13 | NA | -45.0816 | 0.008389 | 0.099186 | 0.212494 | 0 |
| chr16_62827164_62830813_- | Arl13b | NA | -45.0816 | 0.008389 | 0.099186 | 0.212494 | 0 |
| chr2_103771697_103778100_- | Caprin1 | NA | -45.0816 | 0.008389 | 0.099186 | 0.212494 | 0 |
| chr2_58823244_58829867_- | Ccdc148 | NA | -45.0816 | 0.008389 | 0.099186 | 0.212494 | 0 |
| chr2_68220904_68410141_- | Stk39 | NA | -45.0816 | 0.008389 | 0.099186 | 0.212494 | 0 |
| chr3_108480976_108482478_- | 5330417C22Rik | NA | -45.0816 | 0.008389 | 0.099186 | 0.212494 | 0 |
| chr4_126889515_126915665_- | Zmym4 | NA | -45.0816 | 0.008389 | 0.099186 | 0.212494 | 0 |
| chr5_103501367_103501912_+ | Ptpn13 | mm9_circ_012843 | -45.0816 | 0.008389 | 0.099186 | 0.212494 | 0 |
| chr5_141609995_141613240_+ | Sdk1 | NA | -45.0816 | 0.008389 | 0.099186 | 0.212494 | 0 |
| chr5_19999442_20065671_+ | Magi2 | NA | -45.0816 | 0.008389 | 0.099186 | 0.212494 | 0 |
| chr5_20195021_20228451_+ | Magi2 | NA | -45.0816 | 0.008389 | 0.099186 | 0.212494 | 0 |
| chr5_88614941_88617436_+ | Rufy3 | mm9_circ_010480 | -45.0816 | 0.008389 | 0.099186 | 0.212494 | 0 |
| chr7_96703926_96729525_+ | Tenm4 | NA | -45.0816 | 0.008389 | 0.099186 | 0.212494 | 0 |
| chr9_72842695_72858949_+ | Prtg | NA | -45.0816 | 0.008389 | 0.099186 | 0.212494 | 0 |
| chr12_6045162_6046744_+ | not_annotated | NA | -5.35763 | 0.008501 | 0.099186 | 0.584357 | 0.089746 |
| chr2_106699288_106783858_+ | Mpped2 | NA | -5.35763 | 0.008501 | 0.099186 | 0.584357 | 0.089746 |
| chr2_49272041_49313725_+ | Mbd5 | NA | -5.35763 | 0.008501 | 0.099186 | 0.584357 | 0.089746 |
| chr12_101932968_101948439_- | Atxn3 | NA | 4.215631 | 0.008513 | 0.099186 | 0.212494 | 0.777801 |
| chr2_18122245_18146872_+ | Mllt10 | NA | 4.215631 | 0.008513 | 0.099186 | 0.212494 | 0.777801 |
| chr8_25640577_25666156_+ | Whsc1l1 | NA | 2.954238 | 0.008638 | 0.099186 | 0.637481 | 1.615433 |
| chr1_110048817_110052968_+ | Cdh7 | NA | -9.44774 | 0.008678 | 0.099186 | 0.371864 | 0.029915 |
| chr1_119691601_119765922_- | Ptpn4 | NA | -9.44774 | 0.008678 | 0.099186 | 0.371864 | 0.029915 |
| chr1_128211205_128231467_+ | R3hdm1 | NA | -9.44774 | 0.008678 | 0.099186 | 0.371864 | 0.029915 |
| chr11_35883248_35898695_- | Wwc1 | NA | -9.44774 | 0.008678 | 0.099186 | 0.371864 | 0.029915 |
| chr12_3643917_3648389_+ | Dtnb | NA | -9.44774 | 0.008678 | 0.099186 | 0.371864 | 0.029915 |
| chr12_38139405_38173843_+ | Dgkb | NA | -9.44774 | 0.008678 | 0.099186 | 0.371864 | 0.029915 |
| chr12_38147503_38190134_+ | Dgkb | NA | -9.44774 | 0.008678 | 0.099186 | 0.371864 | 0.029915 |
| chr13_106812208_106847459_- | Ipo11 | NA | -9.44774 | 0.008678 | 0.099186 | 0.371864 | 0.029915 |
| chr18_30316843_30324618_+ | Pik3c3 | NA | -9.44774 | 0.008678 | 0.099186 | 0.371864 | 0.029915 |
| chr2_91600641_91601126_+ | Ckap5 | NA | -9.44774 | 0.008678 | 0.099186 | 0.371864 | 0.029915 |
| chr3_94524186_94562284_- | Snx27 | NA | -9.44774 | 0.008678 | 0.099186 | 0.371864 | 0.029915 |
| chr4_57218509_57225900_- | Ptpn3 | NA | -9.44774 | 0.008678 | 0.099186 | 0.371864 | 0.029915 |
| chr7_75117423_75149088_- | Sv2b | NA | -9.44774 | 0.008678 | 0.099186 | 0.371864 | 0.029915 |
| chrX_113064847_113140786_- | Chm | NA | -9.44774 | 0.008678 | 0.099186 | 0.371864 | 0.029915 |
| chrY_1151948_1158634_- | Uty | NA | -9.44774 | 0.008678 | 0.099186 | 0.371864 | 0.029915 |
| chr10_20023608_20082468_+ | Map3k5 | NA | -9.44774 | 0.008678 | 0.099186 | 0.371864 | 0.029915 |
| chr2_90859476_90861449_+ | Mtch2 | NA | -9.44774 | 0.008678 | 0.099186 | 0.371864 | 0.029915 |
| chr3_87926731_87928048_- | Rrnad1 | NA | -9.44774 | 0.008678 | 0.099186 | 0.371864 | 0.029915 |
| chr7_130503722_130513824_- | Ate1 | NA | -9.44774 | 0.008678 | 0.099186 | 0.371864 | 0.029915 |
| chr1_75194841_75196669_+ | Ankzf1 | mm9_circ_015463 | -3.97358 | 0.008805 | 0.099186 | 0.849974 | 0.179493 |
| chr8_64811680_64834568_- | Klhl2 | mm9_circ_016108 | -3.97358 | 0.008805 | 0.099186 | 0.849974 | 0.179493 |
| chrX_10164722_10202165_- | Rpgr | NA | -3.97358 | 0.008805 | 0.099186 | 0.849974 | 0.179493 |
| chr10_14055392_14066684_+ | Hivep2 | NA | 5.723715 | 0.008834 | 0.099186 | 0.106247 | 0.538478 |
| chr11_106248347_106248622_+ | Ddx42 | NA | 5.723715 | 0.008834 | 0.099186 | 0.106247 | 0.538478 |
| chr13_54523970_54529223_+ | Simc1 | NA | 5.723715 | 0.008834 | 0.099186 | 0.106247 | 0.538478 |
| chr5_20789629_20794481_- | Phtf2 | NA | 4.725705 | 0.008903 | 0.099186 | 0.15937 | 0.658139 |
| chr1_116428472_116455217_+ | Cntnap5a | NA | -6.44595 | 0.009187 | 0.099186 | 0.47811 | 0.059831 |
| chr10_25441573_25443954_+ | Epb4.1l2 | NA | -6.44595 | 0.009187 | 0.099186 | 0.47811 | 0.059831 |
| chr10_5061389_5075947_- | Syne1 | NA | -6.44595 | 0.009187 | 0.099186 | 0.47811 | 0.059831 |
| chr12_52795837_52796200_+ | Akap6 | NA | -6.44595 | 0.009187 | 0.099186 | 0.47811 | 0.059831 |
| chr12_75087405_75131026_- | Kcnh5 | NA | -6.44595 | 0.009187 | 0.099186 | 0.47811 | 0.059831 |
| chr13_36232122_36246494_+ | Fars2 | mm9_circ_012541 | -6.44595 | 0.009187 | 0.099186 | 0.47811 | 0.059831 |
| chr17_6106392_6185298_+ | Tulp4 | NA | -6.44595 | 0.009187 | 0.099186 | 0.47811 | 0.059831 |
| chr2_6615688_6721613_- | Celf2 | NA | -6.44595 | 0.009187 | 0.099186 | 0.47811 | 0.059831 |
| chr3_100632504_100656274_- | Man1a2 | NA | -6.44595 | 0.009187 | 0.099186 | 0.47811 | 0.059831 |
| chr4_23771757_23772887_- | not_annotated | mm9_circ_015727 | -6.44595 | 0.009187 | 0.099186 | 0.47811 | 0.059831 |
| chr4_59493186_59494610_- | Ptbp3 | NA | -6.44595 | 0.009187 | 0.099186 | 0.47811 | 0.059831 |
| chr8_104516129_104519823_- | Nae1 | NA | -6.44595 | 0.009187 | 0.099186 | 0.47811 | 0.059831 |
| chr4_3569364_3570372_- | Tmem68 | NA | -6.44595 | 0.009187 | 0.099186 | 0.47811 | 0.059831 |
| chr11_12343744_12378359_- | Cobl | mm9_circ_018049 | -3.55574 | 0.009358 | 0.099186 | 1.009344 | 0.239323 |
| chr6_5100432_5115480_+ | Ppp1r9a | mm9_circ_017898 | -3.55574 | 0.009358 | 0.099186 | 1.009344 | 0.239323 |
| chr10_13801404_13801949_- | Aig1 | NA | 2.409261 | 0.009688 | 0.099186 | 1.859319 | 3.829174 |
| chr6_54194026_54220702_+ | Chn2 | NA | 2.711889 | 0.010216 | 0.099186 | 0.849974 | 1.974418 |
| chr11_105758922_105798824_+ | Tanc2 | NA | -4.15699 | 0.010419 | 0.099186 | 0.743727 | 0.149577 |
| chr11_6311009_6317080_+ | Ogdh | mm9_circ_008777 | -4.15699 | 0.010419 | 0.099186 | 0.743727 | 0.149577 |
| chr12_40621221_40640445_+ | Dock4 | NA | -4.15699 | 0.010419 | 0.099186 | 0.743727 | 0.149577 |
| chr9_107791005_107796537_- | Rbm6 | NA | -4.15699 | 0.010419 | 0.099186 | 0.743727 | 0.149577 |
| chr1_155944099_155962560_- | Cep350 | NA | 51.89737 | 0.010514 | 0.099186 | 0 | 0.209408 |
| chr1_159278089_159289040_+ | Rfwd2 | NA | 51.89737 | 0.010514 | 0.099186 | 0 | 0.209408 |
| chr1_160682041_160740931_- | Rabgap1l | NA | 51.89737 | 0.010514 | 0.099186 | 0 | 0.209408 |
| chr1_161098263_161099285_- | Klhl20 | NA | 51.89737 | 0.010514 | 0.099186 | 0 | 0.209408 |
| chr1_16366079_16394210_- | Stau2 | NA | 51.89737 | 0.010514 | 0.099186 | 0 | 0.209408 |
| chr1_87416818_87428728_+ | Gigyf2 | NA | 51.89737 | 0.010514 | 0.099186 | 0 | 0.209408 |
| chr10_20023608_20046484_+ | Map3k5 | NA | 51.89737 | 0.010514 | 0.099186 | 0 | 0.209408 |
| chr10_40394325_40436212_+ | Cdk19 | NA | 51.89737 | 0.010514 | 0.099186 | 0 | 0.209408 |
| chr10_49522143_49578302_- | Grik2 | NA | 51.89737 | 0.010514 | 0.099186 | 0 | 0.209408 |
| chr10_52346049_52357365_- | Gopc | NA | 51.89737 | 0.010514 | 0.099186 | 0 | 0.209408 |
| chr11_29784064_29805814_- | Eml6 | NA | 51.89737 | 0.010514 | 0.099186 | 0 | 0.209408 |
| chr12_111843545_111872433_- | Ppp1r13b | NA | 51.89737 | 0.010514 | 0.099186 | 0 | 0.209408 |
| chr12_117911018_117916971_- | Dnah11 | NA | 51.89737 | 0.010514 | 0.099186 | 0 | 0.209408 |
| chr12_13317698_13336410_+ | Nbas | NA | 51.89737 | 0.010514 | 0.099186 | 0 | 0.209408 |
| chr12_17402073_17406896_+ | Nol10 | NA | 51.89737 | 0.010514 | 0.099186 | 0 | 0.209408 |
| chr12_55782782_55795776_- | Ralgapa1 | NA | 51.89737 | 0.010514 | 0.099186 | 0 | 0.209408 |
| chr12_57325524_57414410_+ | Mipol1 | NA | 51.89737 | 0.010514 | 0.099186 | 0 | 0.209408 |
| chr12_72783683_72786789_+ | Ppm1a | NA | 51.89737 | 0.010514 | 0.099186 | 0 | 0.209408 |
| chr12_78343352_78454851_+ | Gphn | NA | 51.89737 | 0.010514 | 0.099186 | 0 | 0.209408 |
| chr13_43421211_43430470_- | Ranbp9 | NA | 51.89737 | 0.010514 | 0.099186 | 0 | 0.209408 |
| chr13_55663219_55663941_+ | Ddx46 | NA | 51.89737 | 0.010514 | 0.099186 | 0 | 0.209408 |
| chr14_27438599_27482630_+ | Fam208a | NA | 51.89737 | 0.010514 | 0.099186 | 0 | 0.209408 |
| chr14_78994400_79026077_+ | Vwa8 | NA | 51.89737 | 0.010514 | 0.099186 | 0 | 0.209408 |
| chr15_27605948_27611637_- | Otulin | NA | 51.89737 | 0.010514 | 0.099186 | 0 | 0.209408 |
| chr15_89067558_89069856_+ | Panx2 | NA | 51.89737 | 0.010514 | 0.099186 | 0 | 0.209408 |
| chr16_93801561_93806471_+ | Dopey2 | NA | 51.89737 | 0.010514 | 0.099186 | 0 | 0.209408 |
| chr17_6106392_6207057_+ | Tulp4 | NA | 51.89737 | 0.010514 | 0.099186 | 0 | 0.209408 |
| chr18_25174687_25344962_+ | AW554918 | NA | 51.89737 | 0.010514 | 0.099186 | 0 | 0.209408 |
| chr18_32087070_32093229_+ | Iws1 | NA | 51.89737 | 0.010514 | 0.099186 | 0 | 0.209408 |
| chr18_39126833_39205320_+ | Arhgap26 | NA | 51.89737 | 0.010514 | 0.099186 | 0 | 0.209408 |
| chr18_44442912_44476378_- | Mcc | NA | 51.89737 | 0.010514 | 0.099186 | 0 | 0.209408 |
| chr19_24350134_24360151_- | Pip5k1b | NA | 51.89737 | 0.010514 | 0.099186 | 0 | 0.209408 |
| chr19_46719889_46725038_+ | As3mt | NA | 51.89737 | 0.010514 | 0.099186 | 0 | 0.209408 |
| chr2_105683828_105691723_+ | Pax6 | NA | 51.89737 | 0.010514 | 0.099186 | 0 | 0.209408 |
| chr2_131271559_131282768_+ | Pank2 | NA | 51.89737 | 0.010514 | 0.099186 | 0 | 0.209408 |
| chr2_146340379_146412868_- | Ralgapa2 | NA | 51.89737 | 0.010514 | 0.099186 | 0 | 0.209408 |
| chr2_157053519_157060412_- | Soga1 | NA | 51.89737 | 0.010514 | 0.099186 | 0 | 0.209408 |
| chr3_126810639_126816384_+ | Camk2d | NA | 51.89737 | 0.010514 | 0.099186 | 0 | 0.209408 |
| chr3_131599865_131619289_+ | Papss1 | NA | 51.89737 | 0.010514 | 0.099186 | 0 | 0.209408 |
| chr3_142811527_142821704_- | Pkn2 | NA | 51.89737 | 0.010514 | 0.099186 | 0 | 0.209408 |
| chr3_25434304_25440077_- | Nlgn1 | NA | 51.89737 | 0.010514 | 0.099186 | 0 | 0.209408 |
| chr3_95466773_95476182_+ | Arnt | NA | 51.89737 | 0.010514 | 0.099186 | 0 | 0.209408 |
| chr5_16317635_16333825_+ | Cacna2d1 | NA | 51.89737 | 0.010514 | 0.099186 | 0 | 0.209408 |
| chr5_27752744_27754555_- | Paxip1 | NA | 51.89737 | 0.010514 | 0.099186 | 0 | 0.209408 |
| chr5_29587279_29607098_+ | Ube3c | NA | 51.89737 | 0.010514 | 0.099186 | 0 | 0.209408 |
| chr5_89122402_89149433_+ | Slc4a4 | NA | 51.89737 | 0.010514 | 0.099186 | 0 | 0.209408 |
| chr6_111066762_111207883_+ | Grm7 | NA | 51.89737 | 0.010514 | 0.099186 | 0 | 0.209408 |
| chr6_124962358_124964928_- | Cops7a | NA | 51.89737 | 0.010514 | 0.099186 | 0 | 0.209408 |
| chr6_31418931_31431249_+ | Mkln1 | NA | 51.89737 | 0.010514 | 0.099186 | 0 | 0.209408 |
| chr6_39165097_39181613_- | Kdm7a | NA | 51.89737 | 0.010514 | 0.099186 | 0 | 0.209408 |
| chr7_102129816_102132861_- | Nup98 | NA | 51.89737 | 0.010514 | 0.099186 | 0 | 0.209408 |
| chr7_14563292_14609339_- | Nlrp5-ps | NA | 51.89737 | 0.010514 | 0.099186 | 0 | 0.209408 |
| chr7_67545366_67560064_- | Lrrc28 | NA | 51.89737 | 0.010514 | 0.099186 | 0 | 0.209408 |
| chr8_112773567_112803247_+ | Cntnap4 | NA | 51.89737 | 0.010514 | 0.099186 | 0 | 0.209408 |
| chr8_121752967_121753744_+ | Jph3 | NA | 51.89737 | 0.010514 | 0.099186 | 0 | 0.209408 |
| chr8_25735745_25741354_- | Ddhd2 | NA | 51.89737 | 0.010514 | 0.099186 | 0 | 0.209408 |
| chr8_64093869_64125002_- | Tll1 | NA | 51.89737 | 0.010514 | 0.099186 | 0 | 0.209408 |
| chr9_53633732_53634115_- | Cul5 | NA | 51.89737 | 0.010514 | 0.099186 | 0 | 0.209408 |
| chr9_73734404_73736744_- | Unc13c | NA | 51.89737 | 0.010514 | 0.099186 | 0 | 0.209408 |
| chrX_153148452_153153353_+ | Rragb | NA | 51.89737 | 0.010514 | 0.099186 | 0 | 0.209408 |
| chr1_84782827_84814969_- | Trip12 | NA | 51.89737 | 0.010514 | 0.099186 | 0 | 0.209408 |
| chr11_85032069_85042680_- | Usp32 | NA | 51.89737 | 0.010514 | 0.099186 | 0 | 0.209408 |
| chr12_69302324_69303962_+ | Klhdc2 | mm9_circ_005129 | 51.89737 | 0.010514 | 0.099186 | 0 | 0.209408 |
| chr14_103182354_103292664_- | Mycbp2 | NA | 51.89737 | 0.010514 | 0.099186 | 0 | 0.209408 |
| chr14_121651750_121662593_- | Dock9 | NA | 51.89737 | 0.010514 | 0.099186 | 0 | 0.209408 |
| chr14_12705512_12705844_- | Cadps | NA | 51.89737 | 0.010514 | 0.099186 | 0 | 0.209408 |
| chr15_72512076_72513044_- | Kcnk9 | NA | 51.89737 | 0.010514 | 0.099186 | 0 | 0.209408 |
| chr16_20150442_20162137_+ | Yeats2 | NA | 51.89737 | 0.010514 | 0.099186 | 0 | 0.209408 |
| chr16_7292185_7375969_+ | Rbfox1 | NA | 51.89737 | 0.010514 | 0.099186 | 0 | 0.209408 |
| chr16_89833010_89843334_- | Tiam1 | NA | 51.89737 | 0.010514 | 0.099186 | 0 | 0.209408 |
| chr16_94659497_94673483_+ | Dyrk1a | NA | 51.89737 | 0.010514 | 0.099186 | 0 | 0.209408 |
| chr18_12058926_12070131_- | Tmem241 | NA | 51.89737 | 0.010514 | 0.099186 | 0 | 0.209408 |
| chr19_59207087_59208435_- | not_annotated | NA | 51.89737 | 0.010514 | 0.099186 | 0 | 0.209408 |
| chr2_104221135_104238709_- | D430041D05Rik | NA | 51.89737 | 0.010514 | 0.099186 | 0 | 0.209408 |
| chr2_119919626_119921842_+ | Mga | NA | 51.89737 | 0.010514 | 0.099186 | 0 | 0.209408 |
| chr2_166866912_166871619_+ | Arfgef2 | NA | 51.89737 | 0.010514 | 0.099186 | 0 | 0.209408 |
| chr2_179921152_179933052_- | Taf4a | NA | 51.89737 | 0.010514 | 0.099186 | 0 | 0.209408 |
| chr3_86083227_86085357_+ | Sh3d19 | NA | 51.89737 | 0.010514 | 0.099186 | 0 | 0.209408 |
| chr4_125623481_125632525_+ | Grik3 | NA | 51.89737 | 0.010514 | 0.099186 | 0 | 0.209408 |
| chr4_42995896_42996343_- | Vcp | NA | 51.89737 | 0.010514 | 0.099186 | 0 | 0.209408 |
| chr4_56899026_56937979_- | Tmem245 | NA | 51.89737 | 0.010514 | 0.099186 | 0 | 0.209408 |
| chr4_6417165_6418523_- | Nsmaf | NA | 51.89737 | 0.010514 | 0.099186 | 0 | 0.209408 |
| chr5_146271595_146286239_+ | Cdk8 | NA | 51.89737 | 0.010514 | 0.099186 | 0 | 0.209408 |
| chr5_23384146_23385172_- | not_annotated | NA | 51.89737 | 0.010514 | 0.099186 | 0 | 0.209408 |
| chr6_135152821_135155289_- | Hebp1 | NA | 51.89737 | 0.010514 | 0.099186 | 0 | 0.209408 |
| chr6_47576536_47577667_- | Ezh2 | mm9_circ_002148 | 51.89737 | 0.010514 | 0.099186 | 0 | 0.209408 |
| chr7_46590607_46621674_- | Sergef | NA | 51.89737 | 0.010514 | 0.099186 | 0 | 0.209408 |
| chr7_98979636_98992008_- | Uvrag | NA | 51.89737 | 0.010514 | 0.099186 | 0 | 0.209408 |
| chr8_107338809_107351599_+ | Nfat5 | NA | 51.89737 | 0.010514 | 0.099186 | 0 | 0.209408 |
| chr8_83990428_83990985_+ | Prkaca | NA | 51.89737 | 0.010514 | 0.099186 | 0 | 0.209408 |
| chrX_162546755_162565351_- | Reps2 | NA | 51.89737 | 0.010514 | 0.099186 | 0 | 0.209408 |
